# Supplementary material for: Intermetallic Pd–Y nanoparticles/N-doped carbon nanotubes as multi-active catalysts for oxygen reduction reaction, ethanol oxidation reaction, and zinc–air batteries
Source: Royal Society of Chemistry journal article supplement (doi:10.1039/d3nr06188d), 2024-01-01
Supplement: d3nr06188d1.pdf [file d3nr06188d1.pdf]

Supporting information of

## **Intermetallic Pd-Y Nanoparticles/N-doped Carbon Nanotubes as Multi-active Catalysts for Oxygen Reduction, Ethanol Oxidation, and Zinc-air Battery**

Nipa Roy<sup>a,b</sup>, Mohammad Shamsuddin Ahmed<sup>c,d</sup>, Hyo Kyoung Lee<sup>e</sup>, Seungwon Jeon<sup>a†</sup>

<sup>a</sup>Department of Chemistry and Institute of Basic Science, Chonnam National University, Gwangju 500-757, Republic of Korea. Tel.: +82 62 530 0064; Fax: +82 62 530 3389

<sup>b</sup>Department of Physics, Yeungnam University, Gyeongsan 38541, Republic of Korea

<sup>c</sup>Institute of Energy Studies, University of North Dakota, Grand Forks, North Dakota, United States 58202

<sup>d</sup>Department of Materials Science and Engineering, Chonnam National University Gwangju 61186, Republic of Korea

<sup>e</sup>School of Architecture, Chosun University, 309 Pilmun-daero, Dong-gu, Gwangju, 61452, Republic of Korea

†Corresponding author: Name: Seungwon Jeon; Email: [swjeon3380@naver.com](mailto:swjeon3380@naver.com)

### **1. Experimental details**

#### *1.1. Chemicals and reagents*

Single-walled CNTs with an average tube diameter of 20–30 nm and length of 1–2 μm were obtained from Carbon NanoTech. Co., Ltd., South Korea. 1,5-NDA, yttrium (III) nitrate hexahydrate ( $Y_2(NO_3)_3 \cdot 6H_2O$ ), potassium tetrachloropalladate (II) ( $K_2PdCl_4$ ), and sodium borohydride ( $NaBH_4$ ) were purchased from Sigma–Aldrich, Korea. Sulfuric acid and nitric acid were procured from Ducksan Pure Chemical Industries Co., Ltd. Methanol, ethanol, potassium hydroxide, and potassium chloride were purchased from Dae-Jung Co., Korea. All chemicals and reagents were used of analytical grade and were used without further purification.

#### *1.2. Instruments*

A three-electrode configuration comprising a reference electrode (Ag/AgCl in a 3.0 M KCl filling solution), a counter electrode (Pt wire), and a working electrode (glassy carbon

electrode, GCE) with a uniform diameter of 3.0 mm was employed. To perform electrochemical analysis, we conducted cyclic voltammetry, linear sweep voltammetry, and chronoamperometry using a grounded three-electrode potentiostat in a Faraday cage. Moreover, an electrochemical workstation (CHI700C) and a rotating ring-disk electrode (RRDE) method (EG & G Model 636) were used for hydrodynamics. pH was accurately adjusted using a pH glass electrode with a JENCO meter. High-resolution transmission electron microscopy (TEM) and energy-dispersive X-ray spectroscopy (EDX) were performed on a JEM-2100F microscope (200 kV). X-ray photoelectron spectroscopy (XPS) was conducted using a MultiLab 2000 instrument (Thermo Electron Corporation, England) with an Al K $\alpha$  X-ray source and an energy of 14.9 keV. Furthermore, inductively coupled plasma atomic emission spectroscopy (ICP-AES) was used to determine the weight percentage of metal elements in the synthesized PdY/NCNTs nanostructure. X-ray diffraction (XRD) patterns and Raman spectra of the three samples were obtained from a Rigaku D/max-2500 instrument and a LabRam HR800 UV Raman microscope (Horiba Jobin-Yvon, France) using an Ar<sup>+</sup> laser with 515 nm excitation, respectively.

#### K-L equation

$$\frac{1}{j} = \frac{1}{j_k} + \frac{1}{j_L} = \frac{1}{j_k} + \frac{1}{B\omega^{1/2}} \quad (1)$$

$$B = 0.62 \eta^{2/3} F A C_{O_2} D_{O_2}^{2/3} V^{-1/6} \quad (2)$$

where  $j$  is the experimentally measured current density;  $j_k$  and  $j_l$  are the kinetic and diffusion limiting current densities (mA/cm<sup>2</sup>), respectively;  $\omega$  is the angular velocity of the disk ( $\omega = 2\pi$  rpm);  $A$  and  $\eta$  are the surface area of the disk and electron transfer number, respectively;  $T$  and  $F$  are the temperature and Faraday constant (96485.2 C mol<sup>-1</sup>), respectively;  $C_{O_2}$  and  $D_{O_2}$  are the concentration (1.2 mM L<sup>-1</sup>) and diffusion coefficient (1.9  $\times 10^{-5}$  cm<sup>2</sup> S<sup>-1</sup>) of dissolved O<sub>2</sub> in 0.1 M KOH, respectively; and  $V$  is the kinetic viscosity of the electrolyte (1  $\times 10^{-2}$  cm<sup>2</sup> S<sup>-1</sup>). Based on the K–L equation, plots of  $j^{-1}$  vs.  $\omega^{1/2}$  were analyzed at various electrode potentials. These plots yielded a straight line, and the slopes of these plots reflected the  $B$  factor in equation (1).



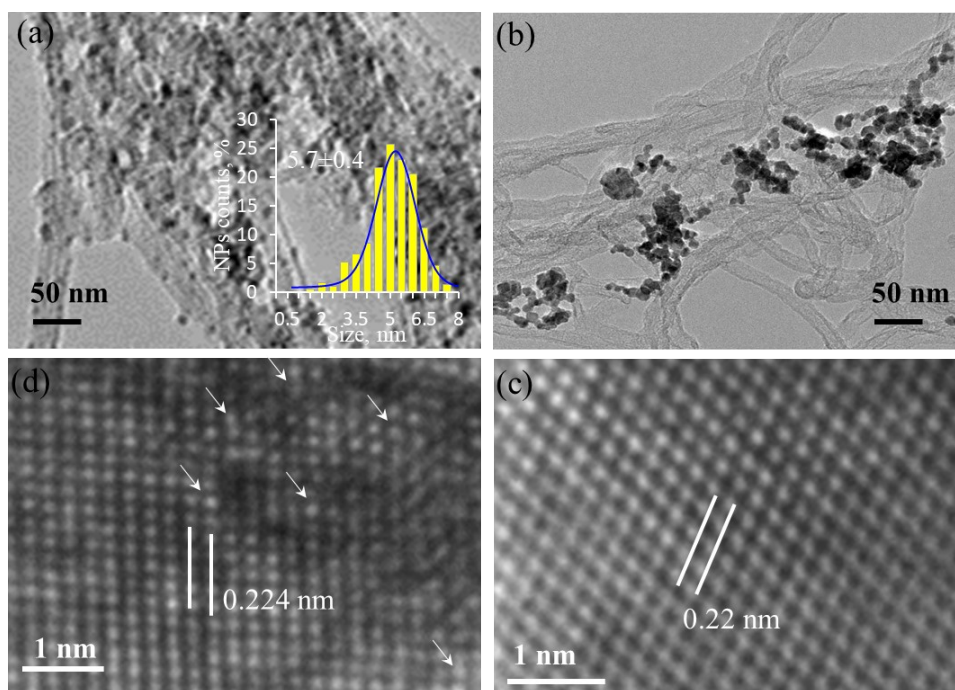

**Figure S1:** TEM images of pure Pd/NCNTs (a) PdY/NCNTs (b) and HRTEM image of Pd/CNTs (c) and PdY/NCNTs (d), inset: the Pd NPs size dependent histogram.

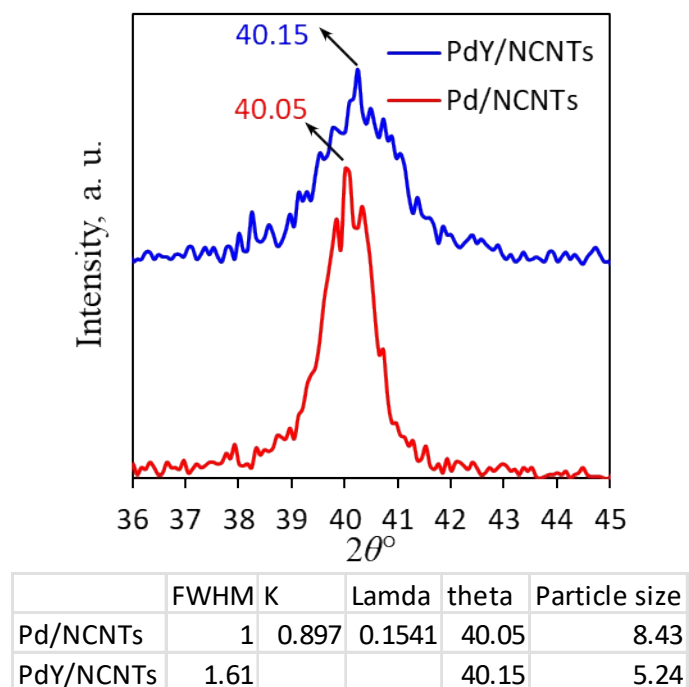

**Figure S2:** The enlarged XRD pattern at (111) plan of FCC Pd and the corresponding parameters used in the calculation.

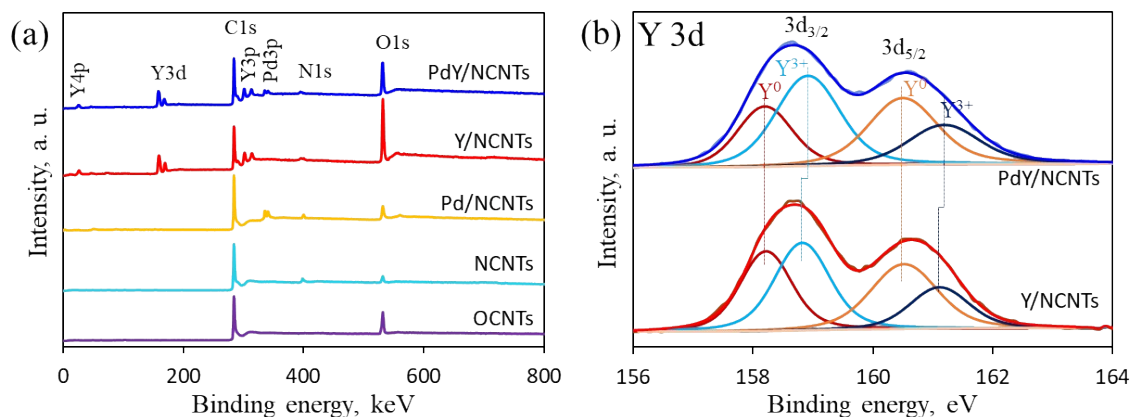

**Figure S3:** XPS survey spectra of corresponding samples (a) and core level of Y 3d XPS spectra of PdY/NCNTs and Y/NCNTs (b).

**Table S1:** Elemental composition of all samples data obtained from the area of XPS peaks.

|           | C wt% | O wt% | N wt% | Y wt% | Pd wt% |
|-----------|-------|-------|-------|-------|--------|
| OCNTs     | 66.1  | 33.9  | -     | -     | -      |
| NCNTs     | 60.2  | 25.8  | 14    | -     | -      |
| Pd/NCNTs  | 68.9  | 10.2  | 9     |       | 11.9   |
| Y/NCNTs   | 69.3  | 11.4  | 8.9   | 10.4  |        |
| Pd/CNTs   | 74.5  | 8.9   | -     | -     | 16.6   |
| PdY/NCNTs | 61.2  | 8.6   | 7     | 10.1  | 13.1   |

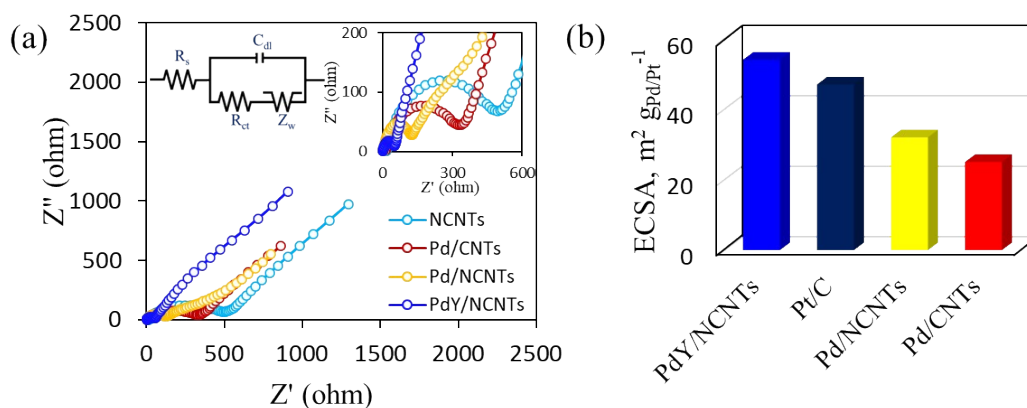

**Figure S4:** EIS spectra of electrocatalysts recorded in an Ar-saturated 0.1 M KCl containing 5 mM  $\text{Fe}(\text{CN})_6^{3-/4-}$  solution at a frequency range from  $10^6$  to  $10^{-2}$  Hz (a); insets: enlarged EIS spectra and the equivalent circuit model, the comparison of ECSA calculated from the CV curves (b).

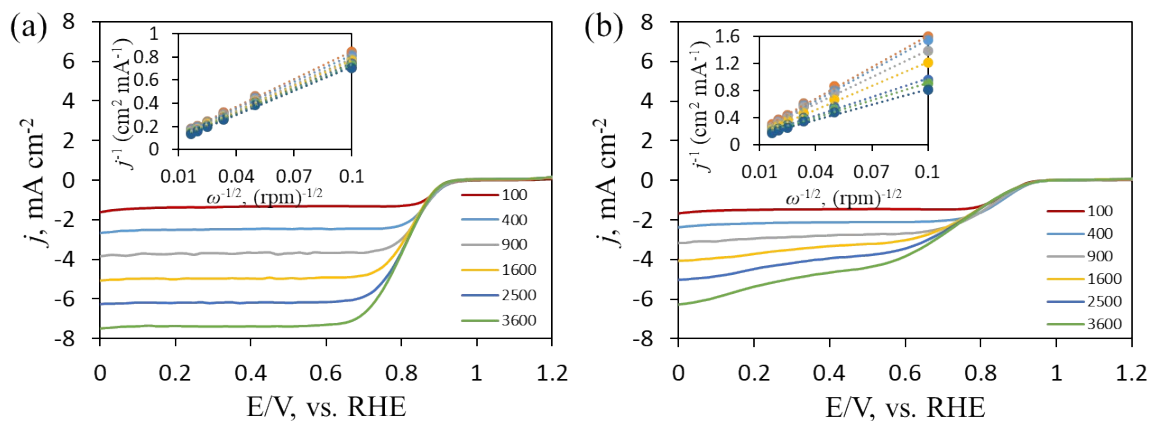

**Figure S5:** LSV curves at various speed ranges for Pd/NCNTs (a) and Pd/CNTs (b); insets: corresponding K–L plots at a potential range of 0.0 to 0.6 V (vs. RHE).

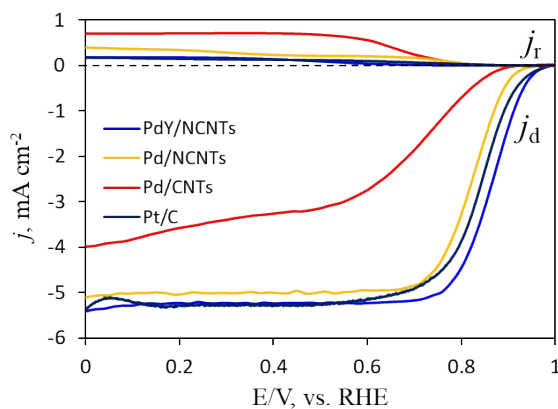

**Figure S6:** RRDE curves for ORR at 1600 rpm in respect to the variable potential from 1.0 to 0.0 V (vs. RHE) on disk electrode and a constant applied potential of 0.8 V (vs. RHE) on the ring electrode.

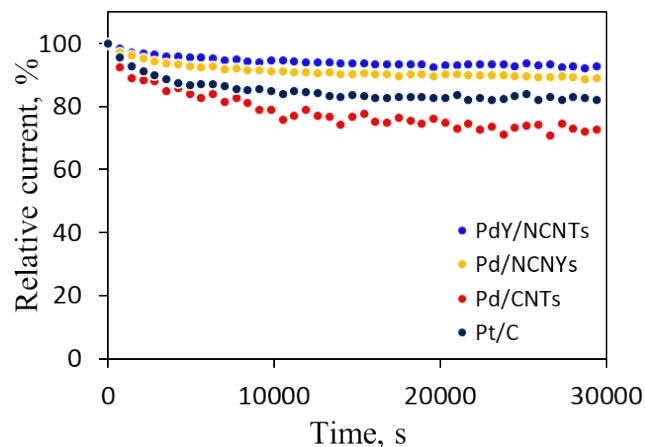

**Figure S7:** CA curves of all Pd-containing catalysts and Pt/C in O<sub>2</sub>-purged 0.1 M KOH electrolyte at a constant applied potential of 0.8 V (vs. RHE).

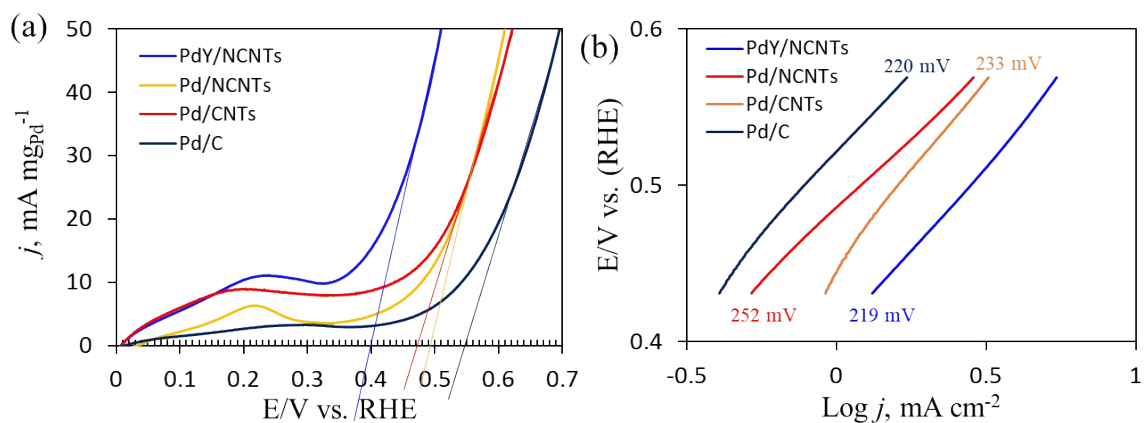

**Figure S8:** Enlarged CV curves of EOR at  $E_0$  region (a) and Tafel plots (b) of all Pd-loaded catalysts.

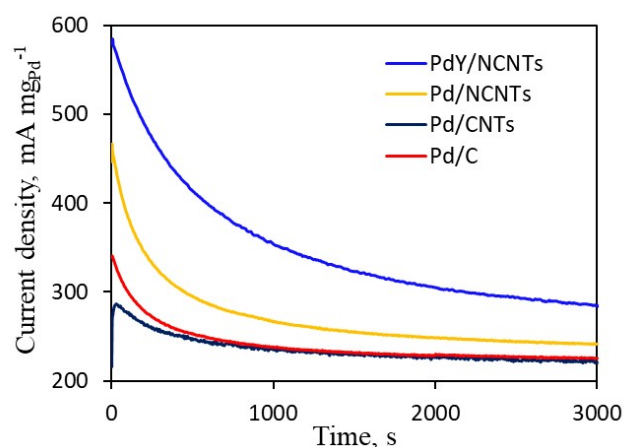

**Figure S9:** CA curves of all Pd-containing catalysts at  $j_f$  of PdY/CNTs (0.92 V vs. RHE) in Ar-purged 1 M KOH electrolyte containing 0.2 M ethanol.

**Table S2:** Comparison of PdY/NCNTs with recently reported Pd-based catalysts in respect to the ORR performance.

| Materials                                           | Electrolyte | $E_0$<br>(V vs. RHE) | $E_{1/2}$<br>(V vs. RHE) | MA (mA<br>$\text{mg}_{\text{Pd}}^{-1}$ ) <sup>@-<math>E_{1/2}</math></sup> | SA<br>(mA $\text{cm}^{-2}$ ) | Refs.                 |
|-----------------------------------------------------|-------------|----------------------|--------------------------|----------------------------------------------------------------------------|------------------------------|-----------------------|
| PdY/NCNTs                                           | 0.1M KOH    | 0.98                 | 0.865                    | 1317                                                                       | 16.775                       | This work             |
| CPCo-3                                              | 0.1M KOH    | 0.932                | 0.886                    | -                                                                          | 17.08                        | [S1] <sup>2023</sup>  |
| Sn <sub>18</sub> Pd <sub>82</sub> alloys            | 0.1 M KOH   | 1.05                 | 0.92                     | 2300                                                                       | 3.46                         | [S2] <sup>2023</sup>  |
| Pd@CoOx/NC1                                         | 0.1 M KOH   | 1.07                 | 0.95                     | 280                                                                        | 3.7                          | [S3] <sup>2023</sup>  |
| N-10h-Pd <sub>3</sub> P <sub>2</sub> S <sub>8</sub> | 0.1 M KOH   | 0.9                  | 0.76                     | 760                                                                        | 0.45                         | [S4] <sup>2022</sup>  |
| Pd/FeCoNC                                           | 0.1 M KOH   | 0.95                 | 0.86                     | -                                                                          | -                            | [S5] <sup>2022</sup>  |
| P-PdPb NFs                                          | 0.1 M KOH   | 1.06                 | 0.95                     | 130                                                                        | 9.2                          | [S6] <sup>2022</sup>  |
| Pd NBs/C                                            | 1 M KOH     | 0.99                 | 0.95                     | 1210                                                                       | 3.6                          | [S7] <sup>2021</sup>  |
| PdBi 8h                                             | 0.1 M KOH   | 0.99                 | 0.93                     | 180                                                                        | 5.3                          | [S8] <sup>2021</sup>  |
| PdY nanosponges                                     | 0.1 M KOH   | 1.02                 | 0.90                     | 4.00 <sup>#</sup>                                                          | 7.98                         | [S9] <sup>2023</sup>  |
| Au@Pd NWs                                           | 0.1 M KOH   | -                    | 0.927                    | 910                                                                        | 1.3                          | [S10] <sup>2023</sup> |
| PdZn bimetalene                                     | 0.1 M KOH   | 1.13                 | 1.05                     | 1.11 <sup>#</sup>                                                          | 2.16                         | [S11] <sup>2023</sup> |

\*mA/cm<sub>Pd</sub><sup>2</sup>; # mA  $\mu\text{g}_{\text{Pd}}^{-1}$

## References

- [S1] T. Yang, D. Bhalothia, H. W. Chang, C. Yan, A. Beniwal, Y. X. Chang, S. C. Wu, P. C. Chen, K. W. Wang, S. Dai, T. Y. Chen, Oxygen vacancies endow atomic cobalt-palladium oxide clusters with outstanding oxygen reduction reaction activity, *Chem. Eng. J.* 454 (2023) 140289
- [S2] D. Liu, S. Tian, Y. Zhang, C. Hu, H. Liu, D. Chen, L. Xu, and J. Yang, Ultrafine SnPd nanoalloys promise high-efficiency electrocatalysis for ethanol oxidation and oxygen reduction, *ACS Appl. Energy Mater* 6 (2023) 1459–1466.
- [S3] F. Nasim, H. Alia, M. A. Nadeem, The pronounced effect of cobalt oxide on the electrocatalytic activity of palladium nanoparticles anchored on CoOx/NC towards the ORR with increased MA and ECSA, *Mater. Adv.*, 2023, 4, 578–585.
- [S4] S. W. Koh, J. Hu, H. Chun, P. Yu, J. Ge, Z. Sun, W. Hong, Q. Liu, K. Nam, B. Han, Z. Liu, H. Li, Two-Dimensional Palladium Phosphoronitride for Oxygen Reduction, *ACS Appl. Mater. Interfaces* 14 (2022) 12156–12167.
- [S5] Z. Cui, X. Bai, Highly active and stable Fe/Co/N Co-doped carbon-anchored Pd nanoparticles for oxygen reduction reaction, *ACS Appl. Mater. Interfaces*, 14 (2022) 9024–9035.
- [S6] Z. Wang, P. Tian, H. Zhang, K. Deng, H. Yu, X. Wang, Y. Xu, H. Wang, L. Wang, Phosphorus-triggered activation of PdPb nanoflowers for enhanced oxygen reduction electrocatalysis, *J. Mater. Chem.* 10 (2022) 15528.
- [S7] Y. Wang, Z. Zhu, K. Xu, W. Guo, T. Yu, M. He, W. Wei, T. Yang, Palladium nanobelts with expanded lattice spacing for electrochemical oxygen reduction in alkaline media, *ACS Appl. Nano Mater.* 4 (2021) 2118–2125.



[S8] S. Sarkar, S. D. Ramarao, T. Das, R. Das, C. P. Vinod, S. Chakraborty, S. C. Peter, Unveiling the roles of lattice strain and descriptor species on Pt-like oxygen reduction activity in Pd–Bi catalysts, *ACS Catal.* 11 (2021) 800–808.

[S9] H. Wang, H. Ren, S. Liu, K. Deng, H. Yu, Y. Xu, X. Li, Z. Wang, L. Wang, Bimetallic PdY nanosponges for enhanced oxygen reduction electrocatalysis *Nanotechnology* 34 (2023) 285402

[S10] D-Y Wei, G-N Xing, H-Q Chen, X-Q Xie, H-M Huang, J-C Dong, J-H Tian, H Zhang, J-F Li, Palladium atomic layers coated on ultrafine gold nanowires boost oxygen reduction reaction *Journal of Colloid and Interface Science* 650 (2023) 1518–1524

[S11] H. Zhang, X. Li, Y. Wang, K. Deng, H. Yu, Y. Xu, H. Wang, Z. Wang, L. Wang, Porous PdZn bimetallic for oxygen reduction electrolysis, *Applied Catalysis B: Environmental*, 338 (2023) 123006

**Table S3:** Comparison of PdY/NCNTs with recently reported Pd-based catalysts in respect to the EOR performance.

| Materials                                                            | Electrolyte | $E_0$ (V vs. RHE) | ECSA ( $\text{m}^2 \text{g}^{-1}$ ) | $j_t/j_b$ | MA ( $\text{mA mg}_{Pd}^{-1}$ @ $j_t$ ) | Refs.                 |
|----------------------------------------------------------------------|-------------|-------------------|-------------------------------------|-----------|-----------------------------------------|-----------------------|
| PdY/NCNTs                                                            | 1 M KOH     | 0.4               | 58                                  | 1.21      | 2902                                    | This work             |
| Sn <sub>18</sub> Pd <sub>82</sub> alloy                              | 1 M KOH     | -                 | 69                                  | 1.04      | 3800                                    | [S1] <sup>2023</sup>  |
| Pd@N,P,S-3DG                                                         | 1 M KOH     | -                 | 50.3                                | 1.18      | 1510                                    | [S2] <sup>2023</sup>  |
| Pd/BNCF-800                                                          | 1 M KOH     | 0.605             | 25.75                               | 0.93      | 1990                                    | [S3] <sup>2022</sup>  |
| Pd <sub>12</sub> /Ru <sub>3</sub> /Ni <sub>3</sub> (OH) <sub>2</sub> | 1 M KOH     | 0.65              | 84.6                                | 0.7       | 3724                                    | [S4] <sup>2022</sup>  |
| Pd <sub>8</sub> Bi NPs                                               | 1 M KOH     | 0.46              | 63.8                                | 3.6       | 2020                                    | [S5] <sup>2022</sup>  |
| Pd NPs@Ni SAC                                                        | 1 M KOH     | 0.41              | 85                                  | 1.1       | 1093                                    | [S6] <sup>2022</sup>  |
| Au@Pd <sub>0.1</sub> /C                                              | 1 M KOH     | 0.51              | 46.2                                | 0.64      | 1185                                    | [S7] <sup>2021</sup>  |
| L-Pd aerogel                                                         | 1 M KOH     | 0.37              | 51.3                                | 0.77      | 2310                                    | [S8] <sup>2021</sup>  |
| Pd-SnO <sub>2</sub> -CSS                                             | 1 M KOH     | 0.58*             | 22.8                                | 0.67      | -                                       | [S9] <sup>2023</sup>  |
| PbNiBi/rGO                                                           | 1 M KOH     | 0.23              | 4.55                                | 1.23      | -                                       | [S10] <sup>2023</sup> |
| Pd-Pb CNCs                                                           | 1 M KOH     | 0.43              | 51.70                               | 1.34      | 4010                                    | [S11] <sup>2024</sup> |

\*vs. (SCE)

## References

[S1] D. Liu, S. Tian, Y. Zhang, C. Hu, H. Liu, D. Chen, Lin Xu, J. Yang, Ultrafine SnPd nanoalloys promise high-efficiency electrocatalysis for ethanol oxidation and oxygen reduction, *ACS Appl. Energy Mater.* 2023, 6, 1459–1466.

[S2] C. Karaman, Engineering of N,P,S-Triple doped 3-dimensional graphene architecture: Catalyst-support for “surface-clean” Pd nanoparticles to boost the electrocatalysis of ethanol oxidation reaction, *Int. J. Hydrogen Energy* 48 (2023) 6691–6701.

- [S3] Y. Su, C. Li, L. Xu, J. Xue, W. Yuan, C. Yao, J. Liu, M. Cheng, Palladium nanoparticles supported on flower-like boron, nitrogen doped carbon for electrochemical oxidation ethanol reaction, *J Alloys Compd* 901 (2022) 163333.
- [S4] A. Pei, G. Li, L. Zhu, Z. Huang, J. Ye, Y-C Chang, S. M. Osman, C. W. Pao, Q. Gao, B. H. Chen, R. Luque, Nickel hydroxide-supported Ru single atoms and Pd nanoclusters for enhanced electrocatalytic hydrogen evolution and ethanol oxidation, *Adv. Funct. Mater.* 2022, 32, 2208587.
- [S5] X. Lao, M. Yang, X. Sheng, J. Sun, Y. Wang, D. Zheng, M. Pang, A. Fu, H. Li, P. Guo, Monodisperse PdBi Nanoparticles with a Face-Centered Cubic Structure for Highly Efficient Ethanol Oxidation, *ACS Appl. Energy Mater.* 2022, 5, 1282–1290.
- [S6] S. Li, A. Guan, H. Wang, Y. Yan, H. Huang, C. Jing, L. Zhang, L. Zhang, G. Zheng, Hybrid palladium nanoparticles and nickel single atom catalysts for efficient electrocatalytic ethanol oxidation, *J. Mater. Chem. A* 10 (2022) 6129–6133.
- [S7] J. G. Ruiz-Montoya, L. M. S. Nunes, A. M. Baena-Moncada, G. Tremiliosi-Filho, J. C. Morales-Gomero, Effect of palladium on gold in core-shell catalyst for electrooxidation of ethanol in alkaline medium, *Int. J. Hydrogen Energy* 46 (2021) 23670–23681.
- [S8] R. Zhang, L. Zhu, X. Liu, J. Zhu, Y. Zhao, Laser-Assisted Synthesis of Pd Aerogel with Compressive Strain for Boosting Formate and Ethanol Electrooxidation, *ACS Sustainable Chem. Eng.* 2021, 9, 7837–7845.
- [S9] An ionic liquid-present hydrothermal method for preparing hawthorn sherry ball shaped palladium (Pd)-based composite catalysts for ethanol oxidation reaction (EOR), *International Journal of Hydrogen Energy*, 45, (2020) 1930-1939
- [S10] S. Wolf, M. Roschger, B. Genorio, N. Hodnik, M. Gatalo, F. Ruiz-Zepeda, V. Hacker, Reduced graphene oxide as efficient carbon support for Pd-based ethanol oxidation catalysts in alkaline media *J. Electrochem. Sci. Eng.* 13 (2023) 771-782
- [S11] Y. Jin, J. Chen, R. Li, J. Chen, J. Wang, T. Huang, X. Zhang, G. Du, K. Cao, B. Liao, Y. Li, J. Su, F. Xu, N. Wang, Y. Wang, X. Luo, J. Wang, W. Ma, Modulating the exposed facets of Pd-Pb intermetallic compounds via morphology engineering for efficient multifunctional electrocatalysts *Applied Surface Science*, 648, (2024) 159093.
